# Supplementary material for: Progress on critical cell fabrication parameters and designs for advanced lithium–sulfur batteries
Source: Royal Society of Chemistry journal article supplement (doi:10.1039/d4cc03085k), 2024-01-01
Supplement: d4cc03085k1.pdf [file d4cc03085k1.pdf]

## Supporting Information

### Progress on Critical Cell-fabrication Parameters and Designs for Advanced Lithium– Sulfur Batteries

*By Cheng-Che Wu,<sup>a</sup> Tzu-Ching Chan<sup>a</sup> and Sheng-Heng Chung<sup>\*,a,b</sup>*

C.-C. Wu, T.-C. Chan and Prof. S.-H. Chung

<sup>a</sup>Department of Materials Science and Engineering, National Cheng Kung University, No.1,  
University Road, Tainan City 70101, Taiwan

<sup>b</sup>Hierarchical Green-Energy Materials Research Center, National Cheng Kung University,  
No.1, University Road, Tainan City 70101, Taiwan

E-mail: [SHChung@gs.ncku.edu.tw](mailto:SHChung@gs.ncku.edu.tw)

## SUPPORTING TABLE

**Table S1.** Cell-fabrication parameters and the resulting electrochemical-performance values.

| Sulfur loading (mg cm <sup>-2</sup> ) | Sulfur content (wt%) | Electrolyte-to-sulfur ratio (μL mg <sup>-1</sup> ) | Electrolyte-to-capacity ratio (μL mA·h <sup>-1</sup> ) | Negative-to-positive capacity ratio | Reference       |
|---------------------------------------|----------------------|----------------------------------------------------|--------------------------------------------------------|-------------------------------------|-----------------|
| 5                                     | --                   | 5                                                  | 5                                                      | 5                                   | 1               |
| 6.5                                   | 70                   | 5                                                  | 6.25                                                   | 2                                   | 5               |
| 4–10                                  | 75                   | 4–6                                                | --                                                     | --                                  | 6               |
| 5–8                                   | --                   | 2–5                                                | 5                                                      | 5                                   | 46              |
| 7                                     | 80                   | 5                                                  | --                                                     | --                                  | 47              |
| 5                                     | 80                   | 5                                                  | --                                                     | --                                  | 48              |
| 4                                     | 60                   | 3–10                                               | --                                                     | 5                                   | 49              |
| 5                                     | 60                   | 5                                                  | 5                                                      | --                                  | 50              |
| 3–7                                   | 64                   | --                                                 | 5                                                      | 2                                   | 51              |
| 5                                     | 70                   | 4                                                  | 5                                                      | --                                  | 52              |
| 5                                     | 60–80                | 5                                                  | 4                                                      | 5                                   | 53              |
| 5                                     | 60                   | 3–11                                               | --                                                     | --                                  | 54              |
| 5                                     | 60                   | 3–11                                               | --                                                     | --                                  | 55              |
| 8                                     | 70                   | 3–7                                                | --                                                     | --                                  | 56              |
| 5                                     | --                   | 4                                                  | --                                                     | 2                                   | 57              |
| 4                                     | 70                   | 3                                                  | --                                                     | 3                                   | 58              |
| 5                                     | 50                   | 5                                                  | 5                                                      | --                                  | 59              |
| 5–6                                   | 66–68                | 4–6                                                | 5                                                      | 4                                   | average value   |
| 5                                     | 60-80                | 5                                                  | 5                                                      | 5                                   | suggested value |
